# Supplementary material for: Impact of the Pd2Spm (Spermine) Complex on the Metabolism of Triple-Negative Breast Cancer Tumors of a Xenograft Mouse Model
Source: MDPI journal article supplement (doi:10.3390/ijms221910775), 2021-10-05
Supplement: s1 [file s1]

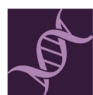

Supplementary Materials

# Impact of the Pd<sub>2</sub>Spm(spermine) complex on the metabolism of Triple-Negative Breast Cancer tumors of a xenograft mouse model

Tatiana J. Carneiro <sup>1</sup>, Rita Araújo <sup>1</sup>, Martin Vojtek <sup>2</sup>, Salomé Gonçalves-Monteiro <sup>2</sup>,  
Ana L. M. Bastista de Carvalho <sup>3</sup>, Maria Paula M. Marques <sup>3,4</sup>, Carmen Diniz <sup>2,\*</sup>, and Ana M. Gil <sup>1,\*</sup>

<sup>1</sup> Department of Chemistry and CICECO-Aveiro Institute of Materials, University of Aveiro, 3810-193 Aveiro, Portugal; tatiana.joao@ua.pt (T.J.C.), anarita.asilva@ua.pt (R.A.), agil@ua.pt (A.M.G.)

<sup>2</sup> LAQV/REQUIMTE, Department of Drug Sciences, Laboratory of Pharmacology, Faculty of Pharmacy, University of Porto, 4150-755 Porto, Portugal; matovoj@gmail.com (M.V.), salomemonteiro8180@gmail.com (S.G.-M.), cdiniz@ff.up.pt (C.D.)

<sup>3</sup> “Química-Física Molecular”, University of Coimbra, 3004-535 Coimbra, Portugal; almbc@uc.pt (A.L.M.B.d.C.), pmc@ci.uc.pt (M.P.M.M.)

<sup>4</sup> Department of Life Sciences, Faculty of Science and Technology, University of Coimbra, 3000-456 Coimbra, Portugal

\* Correspondence: agil@ua.pt (A.M.G.); Tel.: +351 2343700707; and cdiniz@ff.up.pt (C.D.); Tel.: +351 220428608

## Content of Supplementary Material:

**Table S1.** List of metabolites and corresponding spin systems visibly identified in the 500MHz <sup>1</sup>H NMR spectra of aqueous extracts of TNBC tissues from the MDA-MB-231 cell-derived xenograft (CDX) mouse model. Arrows represent the qualitative mean abundance of each compound on tumors’ tissue comparatively to controls: ↑, increased levels; ↓, decreased levels. Arrows in brackets do not statistical relevance and only indicate a variation tendency. \* Possible contamination obtained during the extraction procedure (material disinfection). Metabolite abbreviations: 3-AIBA, 3-aminoisobutyric acid; 3-HBA, 3-hydroxybutyrate; ADP, adenosine diphosphate; AMP, adenosine monophosphate; ATP, adenosine triphosphate; DMA, dimethylamine; GPC, glycerophosphocholine; GSH, glutathione (reduced); IMP, inosine monophosphate; NAD<sup>+</sup>, nicotinamide adenine dinucleotide (reduced); PC, phosphocholine; PE, phosphoethanolamine; SAH, S-adenosylhomocysteine; TMAO, Trimethylamine N-oxide; UDP-GlcA/Glc, uridine diphosphate glucuronate/ glucose; UDP-GlcNAc, uridine diphosphate N-acetylglucosamine; UMP, uridine monophosphate; UTP, uridine triphosphate. Multiplicity abbreviations: s, singlet; d, doublet; dd, double doublet; t, triplet; q, quartet; m, multiplet.

**Figure S1.** Average 500 MHz <sup>1</sup>H NMR spectra of lipophilic extracts of tumors from controls group (exposure to vehicle, PBS) of MDA-MB-231 CDX mouse model. \* Spectral regions assigned to water (δ 1.48 – δ 1.76), and CDCl<sub>3</sub> (and corresponding satellites) (δ 7.00 – δ 7.50), excluded from the multivariate analysis. Abbreviations: Chol., cholesterol; Ester., esterified; FA, fatty acid; PTC, phosphatidylcholine; PTE, phosphatidylethanolamine; PUFA, polyunsaturated fatty acid; SM, sphingomyelin; TG, triglycerides.

**Figure S2.** Heatmap illustrating the metabolic variations of aqueous extracts of tumors from MDA-MB-231 CDX mouse model relative to the pairwise comparisons cDDP / Pd<sub>2</sub>Spm vs. Controls (Ctr), and Pd<sub>2</sub>Spm vs. cDDP. The heatmap is colored according to the Effect Size (ES) in a scale from minimum (blue) to maximum (red) values. ‡ Partial integration of peak. Abbreviations: 3-letter code used for amino acids; ATP, adenosine triphosphate; Cho, choline; Cpd., compound; DMA, dimethylamine; GA, guanidine acetate; HX, hypoxanthine; NAD<sup>+</sup>, nicotinamide adenine dinucleotide (reduced); PE, phosphoethanolamine; UTP, uridine triphosphate; Ui, unassigned resonance i.

**Figure S3.** Bar chart depicting average intensity ratios of choline compounds, obtained with the integration of signals’ area for choline, PC and GPC, singlet resonances at 3.21, 3.22 and 3.23 ppm, respectively. Error bars indicate

the respective standard deviation. Asterisk indicates the significance level of 0.05 (\*  $p$ -value < 5E-2). Mice groups are distinguished by the color of each bar: controls, black; cDDP, blue; Pd<sub>2</sub>Spm red.

**Table S1.** List of metabolites and corresponding spin systems visibly identified in the 500MHz  $^1\text{H}$  NMR spectra of aqueous extracts of TNBC tissues from the MDA-MB-231 cell-derived xenograft (CDX) mouse model. Arrows represent the qualitative mean abundance of each compound on tumors' tissue comparatively to controls:  $\uparrow$ , increased levels;  $\downarrow$ , decreased levels. Arrows in brackets do not statistical relevance and only indicate a variation tendency. \* Possible contamination obtained during the extraction procedure (material disinfection). Metabolite abbreviations: 3-AIBA, 3-aminoisobutyric acid; 3-HBA, 3-hydroxybutyrate; ADP, adenosine diphosphate; AMP, adenosine monophosphate; ATP, adenosine triphosphate; DMA, dimethylamine; GPC, glycerophosphocholine; GSH, glutathione (reduced); IMP, inosine monophosphate; NAD $^+$ , nicotinamide adenine dinucleotide (reduced); PC, phosphocholine; PE, phosphoethanolamine; SAH, S-adenosylhomocysteine; TMAO, Trimethylamine N-oxide; UDP-GlcA/ Glc, uridine diphosphate glucuronate/ glucose; UDP-GlcNAc, uridine diphosphate N-acetylglucosamine; UMP, uridine monophosphate; UTP, uridine triphosphate. Multiplicity abbreviations: s, singlet; d, doublet; dd, double doublet; t, triplet; q, quartet; m, multiplet.

| Metabolite assignment                    | $\delta_{\text{H}}$ ppm<br>(multiplicity, assignment)                                                                                                                   | HMDB ID [92] | Pd2Spm vs.<br>Controls | cDDP vs.<br>Controls |
|------------------------------------------|-------------------------------------------------------------------------------------------------------------------------------------------------------------------------|--------------|------------------------|----------------------|
| <b>Amino acids and related compounds</b> |                                                                                                                                                                         |              |                        |                      |
| Alanine                                  | 1.48 (d, $\beta\text{CH}_3$ ); 3.78 (q, $\alpha\text{CH}$ )                                                                                                             | HMDB0000161  | ( $\uparrow$ )         | ( $\downarrow$ )     |
| Asparagine                               | 2.85 (m, $\beta\text{CH}_2$ )                                                                                                                                           | HMDB0000168  | $\uparrow$             | $\uparrow$           |
| Aspartate                                | 2.68 (dd, $\beta\text{CH}$ ); 2.81 (dd, $\beta'\text{CH}$ ); 3.90 (dd, $\alpha\text{CH}$ )                                                                              | HMDB0000191  | ( $\uparrow$ )         | ( $\downarrow$ )     |
| Creatine                                 | 3.04 (s, N- $\text{CH}_3$ ); 3.93 (s, N- $\text{CH}_2$ )                                                                                                                | HMDB0000064  | ( $\downarrow$ )       | ( $\uparrow$ )       |
| Glutamate                                | 2.04 (m, $\beta\text{CH}$ ); 2.11 (m, $\beta'\text{CH}$ ); 2.36 (m, $\gamma\text{CH}_2$ ); 3.76 (dd, $\alpha\text{CH}$ )                                                | HMDB0000148  | ( $\downarrow$ )       | ( $\downarrow$ )     |
| Glutamine                                | 2.14 (m, $\beta\text{CH}_2$ ); 2.45 (m, $\gamma\text{CH}_2$ ); 3.77 (t, $\alpha\text{CH}$ )                                                                             | HMDB0000641  | ( $\downarrow$ )       | ( $\uparrow$ )       |
| Glycine                                  | 3.55 (s, $\alpha\text{CH}_2$ )                                                                                                                                          | HMDB0000123  | ( $\downarrow$ )       | ( $\uparrow$ )       |
| GSH                                      | 2.17 (m, $\beta\text{CH}_2$ Glu); 2.55 (m, $\gamma\text{CH}_2$ Glu); 2.96 (m, $\alpha\text{CH}_2$ Cys); 3.78 ( $\alpha\text{CH}$ Glu); 4.57 (m, $\beta\text{CH}_2$ Cys) | HMDB0000125  | ( $\downarrow$ )       | ( $\downarrow$ )     |
| Histidine                                | 3.18 (dd, $\beta\text{CH}_2$ ); 3.99 (dd, $\alpha\text{CH}$ ); 7.10 (s, C4H ring); 7.98 (s, C2H ring)                                                                   | HMDB0000177  | -                      | -                    |
| Isoleucine                               | 0.94 (t, $\delta\text{CH}_3$ ); 1.01 (d, $\beta'\text{CH}_3$ ); 1.99 (m, $\beta\text{CH}$ )                                                                             | HMDB0000177  | -                      | ( $\downarrow$ )     |
| Leucine                                  | 0.96 (t, $\delta\text{CH}_3$ / $\delta'\text{CH}_3$ ); 1.71 (m, $\beta\text{CH}_2$ / $\gamma\text{CH}$ )                                                                | HMDB0000687  | -                      | -                    |
| Lysine                                   | 1.45 (m, $\gamma\text{CH}_2$ ); 1.73 (m, $\delta\text{CH}_2$ ); 1.92 (m, $\beta\text{CH}_2$ )                                                                           | HMDB0000182  | ( $\uparrow$ )         | -                    |
| Phenylalanine                            | 7.33 (d, C2H/ C6H ring); 7.38 (m, C4H ring); 7.42 (t, C3H/ C5H ring)                                                                                                    | HMDB0000159  | ( $\uparrow$ )         | ( $\uparrow$ )       |
| Phosphocreatine                          | 3.05 (s, N- $\text{CH}_3$ ); 3.95 (s, N- $\text{CH}_2$ )                                                                                                                | HMDB00001511 | ( $\uparrow$ )         | ( $\uparrow$ )       |
| Proline                                  | 3.34 (m, C2H ring)                                                                                                                                                      | HMDB0000162  |                        |                      |
| Taurine                                  | 3.27 (t, S- $\text{CH}_2$ ); 3.43 (t, N- $\text{CH}_2$ )                                                                                                                | HMDB0000251  | ( $\downarrow$ )       | -                    |
| Threonine                                | 1.33 (d, $\gamma\text{CH}_3$ ); 3.59 (d, $\alpha\text{CH}$ ); 4.24 (m, $\beta\text{CH}$ )                                                                               | HMDB0000167  |                        |                      |
| Tyrosine                                 | 6.90 (d, C3H/ C5H ring); 7.20 (d, C2H/ C6H ring)                                                                                                                        | HMDB0000158  | -                      | ( $\uparrow$ )       |
| Valine                                   | 0.99 (d, $\gamma\text{CH}_3$ ); 1.05 (d, $\gamma'\text{CH}_3$ ); 2.27 (m, $\beta\text{CH}$ ); 3.61 (d, $\alpha\text{CH}$ )                                              | HMDB0000883  | ( $\uparrow$ )         | ( $\downarrow$ )     |
| <b>Choline compounds</b>                 |                                                                                                                                                                         |              |                        |                      |
| Choline                                  | 3.21 (s, N( $\text{CH}_3$ ) $_3$ )                                                                                                                                      | HMDB0000097  | $\uparrow$             | ( $\uparrow$ )       |
| GPC                                      | 3.23 (s, N( $\text{CH}_3$ ) $_3$ ); 3.92 (m, $\alpha\text{CH}_2$ ); 4.33 (m, $\text{PO}_3$ - $\alpha\text{CH}_2$ )                                                      | HMDB0000086  | ( $\uparrow$ )         | ( $\downarrow$ )     |
| PC                                       | 3.22 (s, N( $\text{CH}_3$ ) $_3$ ); 4.17 (m, $\text{PO}_3$ - $\text{CH}_2$ )                                                                                            | HMDB00001565 | ( $\uparrow$ )         | ( $\uparrow$ )       |
| <b>Sugars</b>                            |                                                                                                                                                                         |              |                        |                      |
| $\alpha$ -Glucose                        | 3.53 (dd, C2H); 3.83 (m, C4H); 5.23 (d, C1H)                                                                                                                            | HMDB0003345  | -                      | ( $\uparrow$ )       |
| $\beta$ -Glucose                         | 3.49 (t, C3H); 3.71 (dd, C6H'); 4.65 (d, C1H)                                                                                                                           | HMDB0003345  | -                      | ( $\uparrow$ )       |

(continued)

| Nucleotides and related compounds |                                                                                                                              |             |     |     |
|-----------------------------------|------------------------------------------------------------------------------------------------------------------------------|-------------|-----|-----|
| Adenosine                         | 4.29 (q, C4'H ribose); 4.44 (dd, C3'H ribose); 6.10 (d, C1'H ribose); 8.12 (s, C8H ring); 8.27 (s, C2H ring)                 | HMDB0000050 | (↓) | (↓) |
| ADP                               | 6.15 (d, C1'H ribose); 8.27 (s, C2H ring); 8.54 (s, C8H ring)                                                                | HMDB0001341 | (↑) | (↑) |
| AMP                               | 4.51 (dd, C2'H ribose); 6.14 (d, C1'H ribose); 8.27 (s, C2H ring); 8.60 (s, C8H ring)                                        | HMDB0000045 | (↓) | (↓) |
| ATP                               | 6.15 (d, C1'H ribose); 8.28 (s, C2H ring); 8.54 (s, C8H ring)                                                                | HMDB0000538 | ↑   | ↑   |
| Hypoxanthine                      | 8.18 (s, C2H); 8.20 (s, C8H)                                                                                                 | HMDB0000157 | ↓   | ↓   |
| IMP                               | 8.24 (s, C8H ring); 8.58 (s, C8H ring)                                                                                       | HMDB0000175 | (↓) | (↓) |
| Inosine                           | 6.10 (d, C1'H); 8.24 (s, C8H ring); 8.35 (s, C2H ring)                                                                       | HMDB0000195 | (↑) | (↑) |
| NAD <sup>+</sup>                  | 4.50 (m, A3'); 4.54 (m, N2'); 6.04 (d, N1'); 8.18 (s, A2); 8.19 (N5); 8.43 (s, A8); 8.83 (d, N4); 9.15 (d, N6); 9.34 (s, N2) | HMDB0000902 | (↑) | -   |
| SAH <sup>+</sup>                  | 6.08 (d, N-CH-O)                                                                                                             | HMDB0000939 | (↓) | (↓) |
| UDP-GlcA/ Glc                     | 5.61 (dd, C1H Glc); 7.95 (d, C2H uridine)                                                                                    | HMDB0000935 | (↓) | (↓) |
| UDP-GlcNAc                        | 5.52 (dd, C1H glucose); 5.95 (d, C5H uridine),                                                                               | HMDB0000290 | (↓) | -   |
| UMP                               | 5.99 (m, C6H ring); 8.11 (d, C5H ring)                                                                                       | HMDB0000288 | (↓) | (↓) |
| Uridine                           | 5.90 (d, C5H ring); 5.92 (d, C1'H ring); 7.88 (d, C6H ring)                                                                  | HMDB0000285 | (↑) | (↓) |
| UTP                               | 5.97 (m, C5H ring); 8.00 (d, C6H ring)                                                                                       | HMDB0000285 | (↑) | ↑   |
| Organic acids                     |                                                                                                                              |             |     |     |
| 3-AIBA <sup>+</sup>               | 1.18 (d, αCH)                                                                                                                | HMDB0003911 | -   | (↑) |
| 3-HBA                             | 1.20 (d, CH <sub>3</sub> ); 2.31 (m, CH <sub>2</sub> )                                                                       | HMDB0000357 | (↓) | (↑) |
| Acetate                           | 1.92 (s, CH <sub>3</sub> )                                                                                                   | HMDB0000042 | (↓) | (↓) |
| Formate                           | 8.46 (s, CH)                                                                                                                 | HMDB0000142 | (↑) | (↑) |
| Fumarate                          | 6.52 (s, CH)                                                                                                                 | HMDB0000134 | ↑   | (↑) |
| GA                                | 3.79 (s, CH <sub>2</sub> )                                                                                                   | HMDB0000128 | ↓   | (↓) |
| Lactate                           | 1.33 (d, CH <sub>3</sub> ); 4.10 (q, CH)                                                                                     | HMDB0000190 | (↓) | (↓) |
| Succinate                         | 2.41 (s, CH <sub>2</sub> )                                                                                                   | HMDB0000254 | -   | (↓) |
| Other compounds                   |                                                                                                                              |             |     |     |
| Acetone                           | 2.24 (s, CH <sub>3</sub> )                                                                                                   | HMDB0001659 | (↓) | -   |
| DMA                               | 2.73 (s, (CH <sub>3</sub> ) <sub>2</sub> )                                                                                   | HMDB0000087 | ↓   | ↓   |
| Ethanol <sup>*</sup>              | 1.19 (t, CH <sub>3</sub> ); 3.65 (q, CH <sub>2</sub> )                                                                       | HMDB0000108 | (↓) | (↑) |
| <i>m</i> -Inositol                | 3.28 (t, C5H); 3.62 (t, C4H/ C6H); 4.06 (t, C2H)                                                                             | HMDB0000211 | (↓) | (↓) |
| PE <sup>+</sup>                   | 3.99 (m, PO <sub>3</sub> -CH <sub>2</sub> )                                                                                  | HMDB0000224 | ↓   | (↓) |
| TMAO                              | 3.27 (s, CH <sub>3</sub> )                                                                                                   | HMDB0000925 | (↓) | -   |

Figure S1

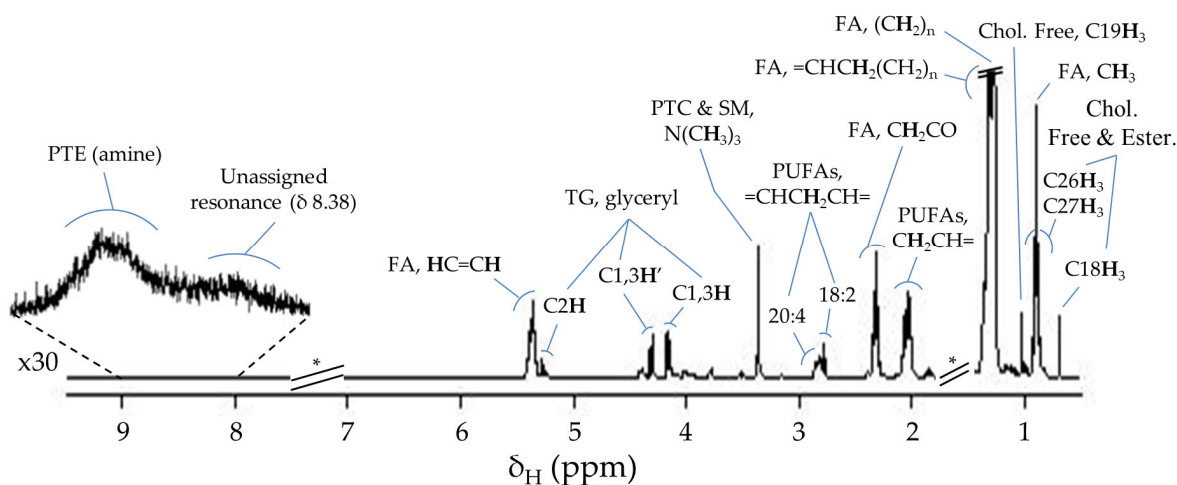

**Figure S1.** Average 500 MHz  $^1\text{H}$  NMR spectra of lipophilic extracts of tumors from controls group (exposure to vehicle, PBS) of MDA-MB-231 CDX mouse model. \* Spectral regions assigned to water ( $\delta$  1.48 –  $\delta$  1.76), and CDCl<sub>3</sub> (and corresponding satellites) ( $\delta$  7.00 –  $\delta$  7.50), excluded from the multivariate analysis. Abbreviations: Chol., cholesterol; Ester., esterified; FA, fatty acid; PTC, phosphatidylcholine; PTE, phosphatidylethanolamine; PUFA, polyunsaturated fatty acid; SM, sphingomyelin; TG, triglycerides.

Figure S2

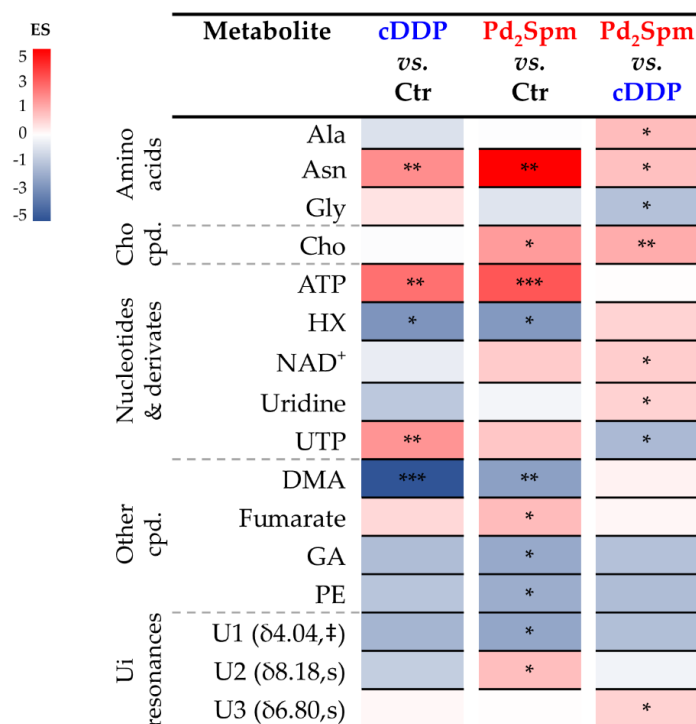

**Figure S2.** Heatmap illustrating the metabolic variations of aqueous extracts of tumors from MDA-MB-231 CDX mouse model relative to the pairwise comparisons cDDP / Pd<sub>2</sub>Spm *vs.* Controls (Ctr), and Pd<sub>2</sub>Spm *vs.* cDDP. The heatmap is colored according to the Effect Size (ES) in a scale from minimum (blue) to maximum (red) values. ‡ Partial integration of peak. Abbreviations: 3-letter code used for amino acids; ATP, adenosine triphosphate; Cho, choline; Cpd., compound; DMA, dimethylamine; GA, guanidine acetate; HX, hypoxanthine; NAD<sup>+</sup>, nicotinamide adenine dinucleotide (reduced); PE, phosphoethanolamine; UTP, uridine triphosphate; Ui, unassigned resonance i.

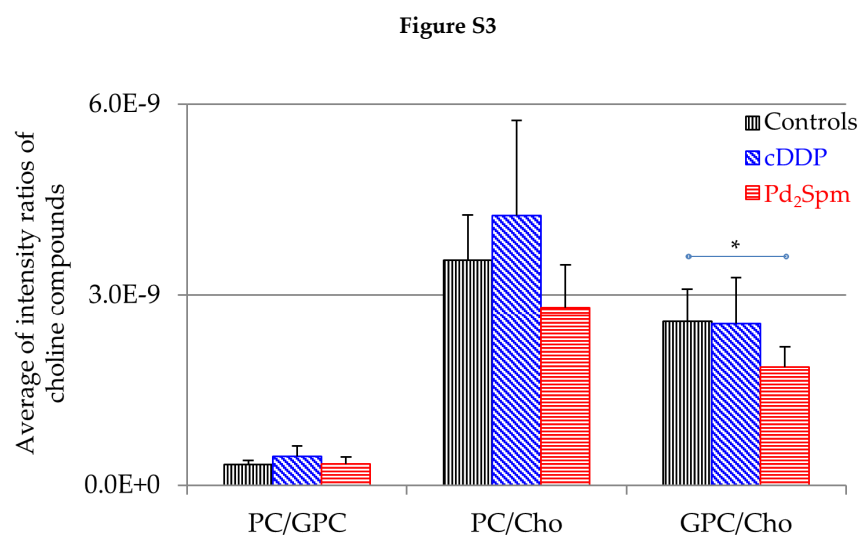

**Figure S3.** Bar chart depicting average intensity ratios of choline compounds, obtained with the integration of signals' area for choline, PC and GPC, singlet resonances at 3.21, 3.22 and 3.23 ppm, respectively. Error bars indicate the respective standard deviation. Asterisk indicates the significance level of 0.05 (\*  $p$ -value < 5E-2). Mice groups are distinguished by the color of each bar: controls, black; cDDP, blue; Pd<sub>2</sub>Spm red.
